# Supplementary material
Source: Springer Nature journal article supplement (https://www.springermedizin.de/resource/supplementary/12937_2012_602_MOESM3_ESM.pdf/25653756)

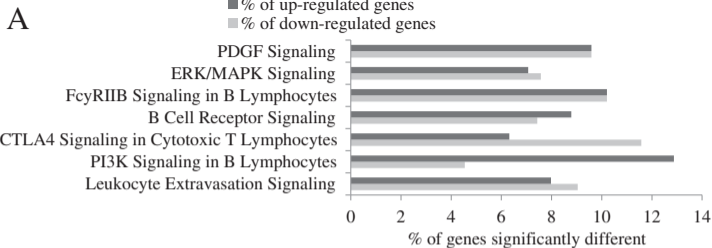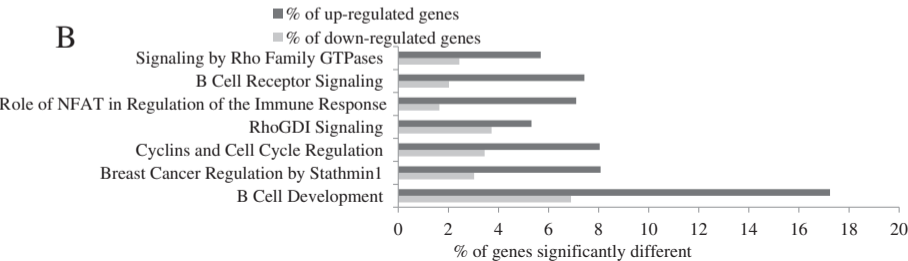

Supplement: MOESM3 [file 25653756]
